# Supplementary material for: Fecal or bacterial transplantation in mice transfer environment-induced brain plasticity and associated behavioral changes
Source: Front Physiol. 2025 May 30;16:1572854. doi: 10.3389/fphys.2025.1572854 (PMC12162564; doi:10.3389/fphys.2025.1572854)
Supplement: Supplementary file 2 [file Table1.xlsx]

## Sheet: DF_sp
Group	Acetatifactor_muris	Acetivibrio_alkalicellulosi	Acetivibrio_mesophilus	Acetivibrio_thermocellus	Acutalibacter_muris	Adlercreutzia_mucosicola	Adlercreutzia_muris	Aestuariispira_ectoiniformans	Alistipes_dispar	Alistipes_finegoldii	Alistipes_montrealensis	Alistipes_okayasuensis	Alistipes_putredinis	Alistipes_timonensis	Alkalibacter_saccharofermentans	Amazoninema_brasiliense	Amedibacillus_dolichus	Amedibacillus_hominis	Anaerobacterium_chartisolvens	Anaerobranca_gottschalkii	Anaerocolumna_chitinilytica	Anaerocolumna_jejuensis	Anaerocolumna_sedimenticola	Anaerocolumna_xylanovorans	Anaeromicropila_populeti	Anaeroplasma_abactoclasticum	Anaeroplasma_varium	Anaerosporobacter_mobilis	Anaerostipes_butyraticus	Anaerostipes_faecalis	Anaerostipes_hadrus	Anaerostipes_hominis	Anaerotaenia_torta	Anaerotignum_aminivorans	Anaerotignum_lactatifermentans	Anaerotruncus_colihominis	Anaerotruncus_rubiinfantis	Angelakisella_massiliensis	Aristaeella_hokkaidonensis	Bacteroides_acidifaciens	Bacteroides_caecimuris	Bacteroides_intestinalis	Bacteroides_oleiciplenus	Bacteroides_pectinophilus	Bacteroides_rodentium	Bacteroides_stercorirosoris	Bacteroides_stercoris	Breznakia_pachnodae	Butyricicoccus_porcorum
BT1-P3-T1	1.03426	0	0	0	0	0	0	0	0	0	4.08988	3.55591	0	0	0	0	0	0	0	0	0	0	0	0	0	0	0	0	0	0	0	0	0	0	0	0	0	0.107806	0	0	2.85349	0	0	0	0	0	0	0	0
BT12-P3-T5	0	0	0	0	0	0	0	0	0	0	4.64786	0.7323	0	0	0	0	0	0	0	0	0	0	0	0	0	0	0	0	0	0	0	0	0	5.09994	0.747245	0.399776	0	0.717355	0	7.51354	2.1969	0	0	0.119559	0	0	0	0	0
BT2-P3-T2	0	0	0	0	0	0	0	0	0	0	5.25298	4.59167	0	0	0	0	0	0	0	0	0	0	0	0	0	0	0	0	0	0	0	0	0	0	0	0	0	0.19938	0	0	4.23633	0	0	0	0	0	0	0	0
BT3-P3-T3	0.773863	0	0	0	0.062672	0	0	0	0	0	7.27268	2.49326	0	0	0	0	0	0	0	0	0	0	0	0	0	0	0	0	0	0	0	0	0	0	0	0	0	0.0790212	0	0.607646	4.79577	0	0	0	0	0	0	0	0
BT4-P3-T4	0.82527	0	0	0	0.0897509	0	0	0	0	0	12.2608	0	0	0	0	0	0	0	0	0	0	0	0	0	0	0	0	0	0	0	0	0	0	0.306466	0	0	0	0	0	6.6744	0.877807	0	0	0	0	0	0	0	0
C2-P3-C1	0	0	0	1.9969	0.33632	0	0	0.16816	0	0	1.80772	7.21774	0	0	0	0	0	0	0	0	0	0	0	0	0	0	0	0	0	0	0	0	0	0	0.26275	0	0	0	0	24.8588	0.585932	0	0	0.0499225	0	0	0	0	0
C3-P3-C2	0.951458	0	0	2.9513	0.334296	0	0	0.0336274	0	0	5.04411	1.55873	0	0	0	0	0	0	0	0	0	0	0	0	0	0	0	0	0	0	0	0	0	0	0.199786	0	0	0	0	14.5804	0.468806	0	0	0	0	0	0	0	0
C4-P3-C5	0	0	0	0	0.954152	0	0	0	11.8614	0.0121936	4.58176	7.6576	0	0	0	0	0	0	0	0	0	0	0	0	0	3.79222	0	0	0	0	0	0	0	0.530423	0	0	0	0.365809	0	15.6841	0.61273	0	0	0	0	0	0	0	0
C6-P3-C3	0.927602	0	0	2.77981	0.442855	0	0	0	1.4318	0	4.36571	0.891695	0.650818	6.00099	0	0	0	0	0	0	0	0	0	0	0	0	0	0	0	0	0.0194497	0.00897679	0	0	0.893191	0	0	0.145125	0	12.37	1.64275	0	0	0.0733105	0	0	0	0	0
C7-P3-C4	0.602965	0	0	1.29605	0	0	0.0278952	0	0.463489	0	6.59614	0.0836856	0.167371	3.88816	0	0	0	0	0	0	0.785357	0	0	0	0	0	0	0	0	0	0	0	0	0.510697	0	0	0	0	0	4.38169	0.484947	0	0	0	0	0	0	0	0
EE136-P6-C1	0.507419	0	0	0	0.0974063	0	0	0.052101	13.7615	0	4.60528	1.41126	0.224261	0.407747	0	0	0	0.110998	0	0.0317137	0	0	0	0	0	0	0	0	0	0	0	0	0	0.523276	0	0	0	0.13365	0	3.10341	0.586703	0	5.48647	0	0	5.93952	0	0	0
EE137-P6-C2	0.704156	0	0	0	0.311864	0	0	0	7.14497	0	3.52735	0.600748	0.100125	0.231436	0.029545	0	0	0	0	0.0623728	0	0	0	0	0	0.0558072	0	0.22487	0	0	0	0.0147725	0	0.917537	0.215022	0	0	0.190401	0	6.62136	0.277395	0	5.20649	0	0	3.40096	0	0.0492417	0
EE138-P6-C3	0	0	0	0.200278	0.100139	0	0	0.0746801	6.69065	0	2.85821	4.14474	0.137479	2.28453	0	0	0	0	0	0	0	0	0	0	0	0	0	0	0	0	0	0	0	0	0	0	0	0.05601	0	2.63417	0.407346	0	4.81008	0	0	9.44194	0	0	0
EE140-P6-C4	0.792948	0	0	0	0.408618	0	0	0	16.2033	0	1.81021	0.622928	0.0742942	0.351469	0	0	0	0.10144	0	0.0871528	0	0	0	0	0	0	0	0.402903	0	0	0	0	0	1.01012	0.175734	0	0	0.80152	0	0.964396	0.258601	0	4.96771	0.0342896	0	3.92331	0	0.0857241	0
EE144-P6-C5	0	0	0	0	0.227056	0	0	0	0	0	4.65919	0.794696	0	0	0	0	0	0	0	0	0	0	0	0	0	0	0	0	0	0	0	0	0	4.97253	0.676627	0.372372	0	0.858272	0	6.70269	1.99809	0	0	0.0681168	0	0	0	0	0
FMT-EE136-P6-T1	0.840171	0	0	0.607992	0.232178	0	0	0	12.5612	0	2.44574	0.3463	0.0846074	0.204632	0	0	0	0	0	0	0.277433	0	0	0	0	3.65189	0	0	0	0	0	0	0	0.694567	0.194794	0	0	0	0	3.83881	0.615863	0	3.86833	0	0.0118057	0.143636	0	0	0
FMT-EE137-P6-T2	1.37706	0	0	0.771342	0	0	0	0	9.78137	0	1.78876	0.390403	0.0686163	0.421162	0	0	0	0	0	0	0	0	0	0	0	1.3321	0	0.24134	0	0	0	0	0	0.806833	0.0922771	0	0	0.309956	0	2.69496	0.440091	0	1.17358	0	0	0	0	0.0236608	0
FMT-EE138-P6-T3	0.432495	0	0	0	0.149224	0	0	0	11.7558	0	1.64652	0.336385	0	0.184633	0	0	0	0	0	0	0	0	0	0	0	5.36193	0.0177045	0.179574	0	0	0	0	0	0.402145	0.386969	0.048055	0.0252921	0.713238	0	2.82007	0.761293	0	2.95412	0	0	0.184633	0	0	0.166928
FMT-EE139-P6-T4	0	0	0	1.11409	0	0	0	0	16.0821	0	2.26945	0	0	0	0	0	0	0	0	0	0	0	0	0	0	2.64081	0	0	0	0	0	0	0	3.99216	0	0.103157	0.0722096	0.866515	0	4.95152	0.649887	0	4.96183	0	0	2.60986	0	0	0
FMT-EE140-P6-T5	0.611978	0	0	1.43974	0.244084	0	0	0	6.9157	0	1.63076	0.173335	0	0	0	0	0	0	0	0	0	0	0	0	0	3.04574	0	0	0	0	0	0	0	1.61307	0.293608	0	0	0	0	1.28409	0.254696	0	3.55867	0	0	0.466943	0	0	0
FMT-SE116-P5-T1	1.49369	0	0	0	0.0420389	0	0	0.0486075	11.2546	0	1.56726	0.776406	0.0853915	0.566211	0	0	0	0	0.0880189	0	0	0	0	0	0	2.59984	0	0	0	0	0	0	0	0.122176	0.0709406	0	0	0	0	3.08592	0.358644	0	2.87966	0	0	0.0420389	0	0	0
FMT-SE117-P5-T2	0.860312	0	0	0.413985	0.239335	0	0	0.368705	8.77131	0	1.19021	2.11197	0.135839	1.1805	0	0	0	0	0	0	0	0	0	0	0	2.24457	0.0291083	0	0	0.00970277	0	0	0	0.78269	0	0	0	0	0	2.8041	0.811799	0	3.43155	0	0	1.03173	0	0	0
FMT-SE118-P5-T3	0.186987	0	0	0.373974	0.17431	0	0	0	12.0432	0	3.13124	0.488068	0.0982474	0.320096	0	0	0	0	0	0	0	0	0	0	0	2.54809	0	0	0	0	0	0	0	0.266219	0	0	0	0	0	1.66387	0.630685	0	8.02776	0	0	0.99832	0	0	0
FMT-SE119-P5-T4	0	0	0	0	0	0	0	0	7.6991	0	1.38448	1.31639	0	0.771675	0	0	0	0	0	0	0	0	0	0	0	2.34529	0	0	0	0	0	0	0	0.189136	0	0	0	0	0	5.75982	0.922984	0	4.34761	0	0	0.408534	0	0	0
FMT-SE120-P5-T5	0.311986	0	0	0.615586	0.0536751	0	0	0.204636	16.2484	0	2.4875	0.823577	0.0620618	0.407595	0	0	0	0	0	0	0	0	0	0	0	3.46036	0	0	0	0	0	0	0	0.16438	0	0.00670938	0.0285149	0.280117	0	2.55963	0.679325	0	5.0421	0	0	3.77067	0.00503204	0	0
SE116-P5-C1	0.0472268	0	0.0396705	0	0.166238	0	0	0.936981	8.88431	0	2.03264	3.56279	0.579946	3.83671	0	0	0	0	0	0	0	0	0	0	0	2.06476	0	0	0	0	0	0	0	0.239912	0	0	0	0.153015	0	0.134124	0.213465	0	2.17055	0	0	0.491159	0	0	0
SE117-P5-C2	0	0	0	0	0.281096	0	0	0.532461	7.70312	0	1.84875	2.82718	0.289205	3.54073	0	0	0	0	0	0	0	0	0	0	0	4.00562	0	0	0	0	0	0.0135142	0	0.79734	0	0	0	0	0	2.63798	0.31353	0	3.78399	0	0	4.35429	0	0	0
SE118-P5-C3	0.914027	0	0	2.44741	0.204633	0	0	0.141879	9.75962	0	3.14589	0.21009	0.141879	1.12957	0.0791247	0	0	0	0	0	0	0	0	0	0	1.64798	0	0	0	0	0	0	0	0.905842	0.128237	0	0	0.240103	0	0.411994	0.240103	0	4.66017	0	0	0.900385	0	0	0
SE119-P5-C4	0.10146	0	0	1.01046	0.0869655	0	0	0.372709	10.411	0	2.7684	1.57159	0.254685	1.31691	0	0	0	0	0	0	0	0	0	0	0	0.956621	0	0	0	0	0	0	0	0.349933	0	0	0	0	0	0.619112	0.490734	0	5.93229	0	0	1.7331	0	0	0
SE129-P5-C5	0.665872	0	0	0	0.110979	0	0	0.197295	12.4152	0	1.95857	0.429529	0.0883719	1.96268	0	0	0	0	0	0	0	0	0	0	0	2.69843	0	0	0	0	0	0	0	0.182909	0	0	0	0.443915	0	0.25073	0.0534342	0	1.28653	0	0	0.316495	0	0	0
[truncated: 139 more columns]

## Sheet: DF_sp_prev5
Group	Acetatifactor_muris	Acetivibrio_thermocellus	Acutalibacter_muris	Adlercreutzia_mucosicola	Adlercreutzia_muris	Aestuariispira_ectoiniformans	Alistipes_dispar	Alistipes_montrealensis	Alistipes_okayasuensis	Alistipes_putredinis	Alistipes_timonensis	Alkalibacter_saccharofermentans	Amedibacillus_dolichus	Amedibacillus_hominis	Anaerobranca_gottschalkii	Anaerocolumna_chitinilytica	Anaerocolumna_jejuensis	Anaeroplasma_abactoclasticum	Anaerosporobacter_mobilis	Anaerostipes_hominis	Anaerotaenia_torta	Anaerotignum_aminivorans	Anaerotignum_lactatifermentans	Anaerotruncus_colihominis	Anaerotruncus_rubiinfantis	Angelakisella_massiliensis	Aristaeella_hokkaidonensis	Bacteroides_acidifaciens	Bacteroides_caecimuris	Bacteroides_oleiciplenus	Bacteroides_pectinophilus	Bacteroides_stercorirosoris	Breznakia_pachnodae	Butyricicoccus_pullicaecorum	Caproiciproducens_galactitolivorans	Cellulosilyticum_ruminicola	Christensenella_hongkongensis	Christensenella_massiliensis	Christensenella_timonensis	Clostridium_cavendishii	Clostridium_colinum	Clostridium_indicum	Clostridium_innocuum	Clostridium_methylpentosum	Clostridium_oryzae	Clostridium_porci	Clostridium_viride	Congzhengia_minquanensis	Corynebacterium_dentalis
BT1-P3-T1	1.03426	0	0	0	0	0	0	4.08988	3.55591	0	0	0	0	0	0	0	0	0	0	0	0	0	0	0	0	0.107806	0	0	2.85349	0	0	0	0	0	0	0	0	0	0	0	0	0.929825	0	0	0	0	0	0	0
BT12-P3-T5	0	0	0	0	0	0	0	4.64786	0.7323	0	0	0	0	0	0	0	0	0	0	0	0	5.09994	0.747245	0.399776	0	0.717355	0	7.51354	2.1969	0	0.119559	0	0	1.59163	0	0	0	0	0	0	0	0	0	0	0	0	0	0	0
BT2-P3-T2	0	0	0	0	0	0	0	5.25298	4.59167	0	0	0	0	0	0	0	0	0	0	0	0	0	0	0	0	0.19938	0	0	4.23633	0	0	0	0	0	0	0	0	0	0	0	0	0	0	0	0	0	0	0	0
BT3-P3-T3	0.773863	0	0.062672	0	0	0	0	7.27268	2.49326	0	0	0	0	0	0	0	0	0	0	0	0	0	0	0	0	0.0790212	0	0.607646	4.79577	0	0	0	0	0	0	0	0	0	0	0	0	0	0.0245238	0	0	0	0	0	0
BT4-P3-T4	0.82527	0	0.0897509	0	0	0	0	12.2608	0	0	0	0	0	0	0	0	0	0	0	0	0	0.306466	0	0	0	0	0	6.6744	0.877807	0	0	0	0	0	0	0	0	0	0	0	0	0	0	0	0	0.376516	0	0	0
C2-P3-C1	0	1.9969	0.33632	0	0	0.16816	0	1.80772	7.21774	0	0	0	0	0	0	0	0	0	0	0	0	0	0.26275	0	0	0	0	24.8588	0.585932	0	0.0499225	0	0	0	0	0	0	0	0	0	0	0	0	0	0	0	0	0	0
C3-P3-C2	0.951458	2.9513	0.334296	0	0	0.0336274	0	5.04411	1.55873	0	0	0	0	0	0	0	0	0	0	0	0	0	0.199786	0	0	0	0	14.5804	0.468806	0	0	0	0	0	0	0	0	0	0	0	0	0	0	0	0	0	0	0	0
C4-P3-C5	0	0	0.954152	0	0	0	11.8614	4.58176	7.6576	0	0	0	0	0	0	0	0	3.79222	0	0	0	0.530423	0	0	0	0.365809	0	15.6841	0.61273	0	0	0	0	4.01475	0	0	0	1.01512	0.313986	0	0	0	0	0.548714	0	0	0.499939	0	0
C6-P3-C3	0.927602	2.77981	0.442855	0	0	0	1.4318	4.36571	0.891695	0.650818	6.00099	0	0	0	0	0	0	0	0	0.00897679	0	0	0.893191	0	0	0.145125	0	12.37	1.64275	0	0.0733105	0	0	1.14005	0	0	0.104729	0.31718	0	0	0.079295	0	0.0374033	0	0	0	0	0	0
C7-P3-C4	0.602965	1.29605	0	0	0.0278952	0	0.463489	6.59614	0.0836856	0.167371	3.88816	0	0	0	0	0.785357	0	0	0	0	0	0.510697	0	0	0	0	0	4.38169	0.484947	0	0	0	0	0.51928	0	0	0.21887	0	0	0	0	0	0	0	0	0	0	0	0
EE136-P6-C1	0.507419	0	0.0974063	0	0	0.052101	13.7615	4.60528	1.41126	0.224261	0.407747	0	0	0.110998	0.0317137	0	0	0	0	0	0	0.523276	0	0	0	0.13365	0	3.10341	0.586703	5.48647	0	5.93952	0	0	0	0	0.124589	0.0815494	0.312606	0	0.0475705	0	0	0.138181	0.144977	0.99445	0.355646	0	0
EE137-P6-C2	0.704156	0	0.311864	0	0	0	7.14497	3.52735	0.600748	0.100125	0.231436	0.029545	0	0	0.0623728	0	0	0.0558072	0.22487	0.0147725	0	0.917537	0.215022	0	0	0.190401	0	6.62136	0.277395	5.20649	0	3.40096	0.0492417	0.109973	0	0	0.523603	0.912612	0.0640142	0	0	0.293809	0	0.0952006	0.139518	0.551507	0.787867	0	0.293809
EE138-P6-C3	0	0.200278	0.100139	0	0	0.0746801	6.69065	2.85821	4.14474	0.137479	2.28453	0	0	0	0	0	0	0	0	0	0	0	0	0	0	0.05601	0	2.63417	0.407346	4.81008	0	9.44194	0	0.161241	0	0.0152755	0.108626	0	0	0	0	0	0	0	0	0.264775	0.237618	0	0
EE140-P6-C4	0.792948	0	0.408618	0	0	0	16.2033	1.81021	0.622928	0.0742942	0.351469	0	0	0.10144	0.0871528	0	0	0	0.402903	0	0	1.01012	0.175734	0	0	0.80152	0	0.964396	0.258601	4.96771	0.0342896	3.92331	0.0857241	0.148588	0	0.0400046	0.21431	0.571494	0.360041	0	0	0	0	0.221454	0.0657218	1.45302	0.371471	0	0
EE144-P6-C5	0	0	0.227056	0	0	0	0	4.65919	0.794696	0	0	0	0	0	0	0	0	0	0	0	0	4.97253	0.676627	0.372372	0	0.858272	0	6.70269	1.99809	0	0.0681168	0	0	1.70746	0	0	0	0	0	0	0	0	0	0	0	0	0	0	0
FMT-EE136-P6-T1	0.840171	0.607992	0.232178	0	0	0	12.5612	2.44574	0.3463	0.0846074	0.204632	0	0	0	0	0.277433	0	3.65189	0	0	0	0.694567	0.194794	0	0	0	0	3.83881	0.615863	3.86833	0	0.143636	0	0	0	0	1.86136	0.643409	0	0	0	0.269563	0	0	0	0.794916	0.389587	0.0511579	0.0472227
FMT-EE137-P6-T2	1.37706	0.771342	0	0	0	0	9.78137	1.78876	0.390403	0.0686163	0.421162	0	0	0	0	0	0	1.3321	0.24134	0	0	0.806833	0.0922771	0	0	0.309956	0	2.69496	0.440091	1.17358	0	0	0.0236608	0	0	0	0.688529	1.28242	0.160893	0	0	0	0	0.210581	0	1.31317	0	0	0.137233
FMT-EE138-P6-T3	0.432495	0	0.149224	0	0	0	11.7558	1.64652	0.336385	0	0.184633	0	0	0	0	0	0	5.36193	0.179574	0	0	0.402145	0.386969	0.048055	0.0252921	0.713238	0	2.82007	0.761293	2.95412	0	0.184633	0	0	0	0	0.64242	0.86752	0	0	0	0	0	0.139107	0	0	0	0	0
FMT-EE139-P6-T4	0	1.11409	0	0	0	0	16.0821	2.26945	0	0	0	0	0	0	0	0	0	2.64081	0	0	0	3.99216	0	0.103157	0.0722096	0.866515	0	4.95152	0.649887	4.96183	0	2.60986	0	0	0	0	0	0	0	0	0	0	0	1.03157	0	0	0	0	0
FMT-EE140-P6-T5	0.611978	1.43974	0.244084	0	0	0	6.9157	1.63076	0.173335	0	0	0	0	0	0	0	0	3.04574	0	0	0	1.61307	0.293608	0	0	0	0	1.28409	0.254696	3.55867	0	0.466943	0	0	0	0.183947	0.799462	2.11893	0	0	0	0	0	0	0	0	0	0	0
FMT-SE116-P5-T1	1.49369	0	0.0420389	0	0	0.0486075	11.2546	1.56726	0.776406	0.0853915	0.566211	0	0	0	0	0	0	2.59984	0	0	0	0.122176	0.0709406	0	0	0	0	3.08592	0.358644	2.87966	0	0.0420389	0	0	0	0.0170783	1.50683	0.442722	0	0	0	0	0	0.298213	0	0.440095	0.453232	0	0.0893326
FMT-SE117-P5-T2	0.860312	0.413985	0.239335	0	0	0.368705	8.77131	1.19021	2.11197	0.135839	1.1805	0	0	0	0	0	0	2.24457	0	0	0	0.78269	0	0	0	0	0	2.8041	0.811799	3.43155	0	1.03173	0	0.236101	0	0	0.507778	0.0517481	0	0	0	0	0	0.213461	0	0	0.278146	0	0
FMT-SE118-P5-T3	0.186987	0.373974	0.17431	0	0	0	12.0432	3.13124	0.488068	0.0982474	0.320096	0	0	0	0	0	0	2.54809	0	0	0	0.266219	0	0	0	0	0	1.66387	0.630685	8.02776	0	0.99832	0	0	0	0	1.59097	0.659208	0	0	0	0	0	0	0	0	0	0	0
FMT-SE119-P5-T4	0	0	0	0	0	0	7.6991	1.38448	1.31639	0	0.771675	0	0	0	0	0	0	2.34529	0	0	0	0.189136	0	0	0	0	0	5.75982	0.922984	4.34761	0	0.408534	0	0	0	0	1.13229	0.148787	0	0	0	0	0	0	0	0.527059	0	0	0
FMT-SE120-P5-T5	0.311986	0.615586	0.0536751	0	0	0.204636	16.2484	2.4875	0.823577	0.0620618	0.407595	0	0	0	0	0	0	3.46036	0	0	0	0.16438	0	0.00670938	0.0285149	0.280117	0	2.55963	0.679325	5.0421	0	3.77067	0	0.40424	0	0	1.32846	0.0335469	0.129156	0.157671	0	0	0	0.0771579	0	0	0.375725	0	0
SE116-P5-C1	0.0472268	0	0.166238	0	0	0.936981	8.88431	2.03264	3.56279	0.579946	3.83671	0	0	0	0	0	0	2.06476	0	0	0	0.239912	0	0	0	0.153015	0	0.134124	0.213465	2.17055	0	0.491159	0	0	1.50748	0	1.0541	0.443932	0.477936	0	0	0.825525	0	0	0.077452	0.120901	0.18324	0.051005	0
SE117-P5-C2	0	0	0.281096	0	0	0.532461	7.70312	1.84875	2.82718	0.289205	3.54073	0	0	0	0	0	0	4.00562	0	0.0135142	0	0.79734	0	0	0	0	0	2.63798	0.31353	3.78399	0	4.35429	0	0	1.08114	0	0.283799	0.545975	0.405427	0	0	0	0	0	0.205417	0.737878	0.218931	0	0
SE118-P5-C3	0.914027	2.44741	0.204633	0	0	0.141879	9.75962	3.14589	0.21009	0.141879	1.12957	0.0791247	0	0	0	0	0	1.64798	0	0	0	0.905842	0.128237	0	0	0.240103	0	0.411994	0.240103	4.66017	0	0.900385	0	0.709394	0	0	0.491119	2.26733	0	0	0	0	0	0	0	0	0.335598	0	0.150064
SE119-P5-C4	0.10146	1.01046	0.0869655	0	0	0.372709	10.411	2.7684	1.57159	0.254685	1.31691	0	0	0	0	0	0	0.956621	0	0	0	0.349933	0	0	0	0	0	0.619112	0.490734	5.93229	0	1.7331	0	0	0	0.0455534	2.60275	0.401698	0	0	0.0724713	0	0	0	0.0993892	0	0.308521	0.122166	0
SE129-P5-C5	0.665872	0	0.110979	0	0	0.197295	12.4152	1.95857	0.429529	0.0883719	1.96268	0	0	0	0	0	0	2.69843	0	0	0	0.182909	0	0	0	0.443915	0	0.25073	0.0534342	1.28653	0	0.316495	0	0	3.05191	0	0.750134	1.16733	0.230178	0	0	0	0	0	0.0246619	0	0.324715	0	0
[truncated: 79 more columns]

## Sheet: DF_sp_prev20
Group	Acetatifactor_muris	Acetivibrio_thermocellus	Acutalibacter_muris	Aestuariispira_ectoiniformans	Alistipes_dispar	Alistipes_montrealensis	Alistipes_okayasuensis	Alistipes_putredinis	Alistipes_timonensis	Alkalibacter_saccharofermentans	Anaeroplasma_abactoclasticum	Anaerotignum_aminivorans	Anaerotignum_lactatifermentans	Angelakisella_massiliensis	Bacteroides_acidifaciens	Bacteroides_caecimuris	Bacteroides_oleiciplenus	Bacteroides_stercorirosoris	Butyricicoccus_pullicaecorum	Christensenella_hongkongensis	Christensenella_massiliensis	Christensenella_timonensis	Clostridium_methylpentosum	Clostridium_oryzae	Clostridium_porci	Clostridium_viride	Desulfitobacterium_metallireducens	Duncaniella_dubosii	Duncaniella_freteri	Duncaniella_muricolitica	Duncaniella_muris	Dysosmobacter_acutus	Eisenbergiella_porci	Eubacterium_coprostanoligenes	Eubacterium_siraeum	Flintibacter_butyricus	Fusimonas_intestini	Gracilibacter_thermotolerans	Guopingia_tenuis	Heminiphilus_faecis	Intestinimonas_timonensis	Jutongia_huaianensis	Kineothrix_alysoides	Lachnoclostridium_edouardi	Lacrimispora_indolis	Lacrimispora_saccharolytica	Lactobacillus_taiwanensis	Lawsonia_intracellularis	Lawsonibacter_asaccharolyticus
BT1-P3-T1	1.03426	0	0	0	0	4.08988	3.55591	0	0	0	0	0	0	0.107806	0	2.85349	0	0	0	0	0	0	0	0	0	0	0	2.3751	0	0	48.9118	0	0	0	0	0.0589563	0.0993835	0	3.23249	2.77095	0	0	0.148233	0.277937	0	0	0.141495	0	0.262777
BT12-P3-T5	0	0	0	0	0	4.64786	0.7323	0	0	0	0	5.09994	0.747245	0.717355	7.51354	2.1969	0	0	1.59163	0	0	0	0	0	0	0	0	1.89053	0	0	13.1889	0	0	0	0	6.09752	0	0	0.829441	0.399776	0	0	0	11.3992	0	0	0	0	0
BT2-P3-T2	0	0	0	0	0	5.25298	4.59167	0	0	0	0	0	0	0.19938	0	4.23633	0	0	0	0	0	0	0	0	0	0	0	3.9422	0	0	40.109	0	0	0	0	0.264524	0	0	1.08376	5.39708	0	0	0	0.165821	0	0	0.108573	0	0.157925
BT3-P3-T3	0.773863	0	0.062672	0	0	7.27268	2.49326	0	0	0	0	0	0	0.0790212	0.607646	4.79577	0	0	0	0	0	0	0	0	0	0	0	0	0	0	23.0088	0	0	0	0	0.220714	0.574948	0	0.983678	6.34622	0	0	3.21535	0.94008	0	0	0.040873	0	0
BT4-P3-T4	0.82527	0	0.0897509	0	0	12.2608	0	0	0	0	0	0.306466	0	0	6.6744	0.877807	0	0	0	0	0	0	0	0	0.376516	0	0	0	0	0	39.1795	0	0	0	0	0.48159	0	0	0	0	0	0	0	1.19303	0	0	0.0897509	0	0
C2-P3-C1	0	1.9969	0.33632	0.16816	0	1.80772	7.21774	0	0	0	0	0	0.26275	0	24.8588	0.585932	0	0	0	0	0	0	0	0	0	0	0	0	0	0	14.9216	0	0	0	0	0	0	0	0.0551775	0.02102	0	0	0	1.0799	0	0	0.218082	0	0
C3-P3-C2	0.951458	2.9513	0.334296	0.0336274	0	5.04411	1.55873	0	0	0	0	0	0.199786	0	14.5804	0.468806	0	0	0	0	0	0	0	0	0	0	0	0	0	0	15.8979	0	2.45282	0	0	0.504411	0	0	0.152312	0.130553	0	0	0	0.91783	0	0	0.690351	0	0.492543
C4-P3-C5	0	0	0.954152	0	11.8614	4.58176	7.6576	0	0	0	3.79222	0.530423	0	0.365809	15.6841	0.61273	0	0	4.01475	0	1.01512	0.313986	0.548714	0	0	0.499939	0	0	0	0	13.1813	0	0	0	0	1.31386	0	0	3.57883	0	0	0	0	1.22851	0	0	0.414584	0	0
C6-P3-C3	0.927602	2.77981	0.442855	0	1.4318	4.36571	0.891695	0.650818	6.00099	0	0	0	0.893191	0.145125	12.37	1.64275	0	0	1.14005	0.104729	0.31718	0	0	0	0	0	0.0807912	3.57426	0	0	8.98727	0	0	0	1.01139	1.41235	1.55747	0	2.10655	0.731609	0	0	0	5.05244	1.48716	0	0	0	0
C7-P3-C4	0.602965	1.29605	0	0	0.463489	6.59614	0.0836856	0.167371	3.88816	0	0	0.510697	0	0	4.38169	0.484947	0	0	0.51928	0.21887	0	0	0	0	0	0	0	2.22089	0	0	12.6537	0	0.472073	0	0.102998	0	9.58093	0	1.9076	0.637298	0	0	3.68002	3.48905	0.459198	0	0	0	0
EE136-P6-C1	0.507419	0	0.0974063	0.052101	13.7615	4.60528	1.41126	0.224261	0.407747	0	0	0.523276	0	0.13365	3.10341	0.586703	5.48647	5.93952	0	0.124589	0.0815494	0.312606	0.138181	0.144977	0.99445	0.355646	0	6.10941	0.317137	0.0588968	5.92819	0.26277	0	0	0	0.858534	1.57436	0.181221	0	0.08608	0	1.04202	0	0	0	0	0	0	1.44297
EE137-P6-C2	0.704156	0	0.311864	0	7.14497	3.52735	0.600748	0.100125	0.231436	0.029545	0.0558072	0.917537	0.215022	0.190401	6.62136	0.277395	5.20649	3.40096	0.109973	0.523603	0.912612	0.0640142	0.0952006	0.139518	0.551507	0.787867	0.149366	6.04031	0.142801	2.80513	4.67632	0	2.34226	0	0.0755039	0.891274	2.18961	0.124746	0.05909	0.0410347	0.0393933	0.175629	6.29637	0.469437	0.76817	2.02876	0.228153	0	0
EE138-P6-C3	0	0.200278	0.100139	0.0746801	6.69065	2.85821	4.14474	0.137479	2.28453	0	0	0	0	0.05601	2.63417	0.407346	4.81008	9.44194	0.161241	0.108626	0	0	0	0	0.264775	0.237618	0	6.11698	0.244407	2.8616	8.23348	0	0	0.0814692	0.115415	0.300418	0	0	0	0.0950474	0	0	0	0	0	0.234224	0	0.0882583	0.151057
EE140-P6-C4	0.792948	0	0.408618	0	16.2033	1.81021	0.622928	0.0742942	0.351469	0	0	1.01012	0.175734	0.80152	0.964396	0.258601	4.96771	3.92331	0.148588	0.21431	0.571494	0.360041	0.221454	0.0657218	1.45302	0.371471	0	5.55492	0.185736	3.03463	4.89913	0.0642931	0	0.0285747	0.0957252	1.13299	2.06309	0.091439	0.0557207	0.0457195	0.0585781	0.464339	0.815808	0.481484	0	2.19168	0.348611	0.992971	0
EE144-P6-C5	0	0	0.227056	0	0	4.65919	0.794696	0	0	0	0	4.97253	0.676627	0.858272	6.70269	1.99809	0	0	1.70746	0	0	0	0	0	0	0	0	2.13433	0	0	14.0366	0	0	0	0	3.74188	0	0	0.989964	0.385995	0	0	0	10.6489	0	0	0	0	0
FMT-EE136-P6-T1	0.840171	0.607992	0.232178	0	12.5612	2.44574	0.3463	0.0846074	0.204632	0	3.65189	0.694567	0.194794	0	3.83881	0.615863	3.86833	0.143636	0	1.86136	0.643409	0	0	0	0.794916	0.389587	0	4.91707	0.184956	1.3911	4.37007	0.0767369	0.0550932	0.0550932	0.0491903	0.60209	9.0156	0.259725	0	0.0196761	0.025579	0.171182	3.98245	1.86136	0.761466	0.838203	0.151506	0.125927	0
FMT-EE137-P6-T2	1.37706	0.771342	0	0	9.78137	1.78876	0.390403	0.0686163	0.421162	0	1.3321	0.806833	0.0922771	0.309956	2.69496	0.440091	1.17358	0	0	0.688529	1.28242	0.160893	0.210581	0	1.31317	0	0	4.63042	0.12067	0.984289	3.59171	0.215313	0	0.146697	0.189286	1.28242	9.67963	0.298126	0.447189	0.0709824	0	0.780806	1.05291	2.49148	0	0	0.160893	0.35018	0
FMT-EE138-P6-T3	0.432495	0	0.149224	0	11.7558	1.64652	0.336385	0	0.184633	0	5.36193	0.402145	0.386969	0.713238	2.82007	0.761293	2.95412	0.184633	0	0.64242	0.86752	0	0.139107	0	0	0	0.470434	4.10997	0.16187	1.0648	3.74829	0	6.66195	0	0	0.882695	5.55921	0.364207	1.89944	0.0379382	0	0	0.141636	0.586777	0	1.31266	0.209925	0.687946	0
FMT-EE139-P6-T4	0	1.11409	0	0	16.0821	2.26945	0	0	0	0	2.64081	3.99216	0	0.866515	4.95152	0.649887	4.96183	2.60986	0	0	0	0	1.03157	0	0	0	0.505467	2.75428	0	0.0515783	0.990303	0	0	0.0515783	0	0	0	0.660202	0	0.0412626	0	0	0	0	0	0	0	1.55766	0
FMT-EE140-P6-T5	0.611978	1.43974	0.244084	0	6.9157	1.63076	0.173335	0	0	0	3.04574	1.61307	0.293608	0	1.28409	0.254696	3.55867	0.466943	0	0.799462	2.11893	0	0	0	0	0	0	6.3108	0	1.51403	5.98535	0	0	0	0	1.30885	0	0.237009	0.279458	0.0884361	0	0	0	0	0.491705	0	0.169797	0.505854	0
FMT-SE116-P5-T1	1.49369	0	0.0420389	0.0486075	11.2546	1.56726	0.776406	0.0853915	0.566211	0	2.59984	0.122176	0.0709406	0	3.08592	0.358644	2.87966	0.0420389	0	1.50683	0.442722	0	0.298213	0	0.440095	0.453232	0	6.83789	0.277194	1.1298	5.23516	0.0341566	0	0.0775092	0	0.528114	0	0.513663	0.291645	0.0945875	0.0354703	0	0	0.320547	0	0	0.110352	0.174724	0.568839
FMT-SE117-P5-T2	0.860312	0.413985	0.239335	0.368705	8.77131	1.19021	2.11197	0.135839	1.1805	0	2.24457	0.78269	0	0	2.8041	0.811799	3.43155	1.03173	0.236101	0.507778	0.0517481	0	0.213461	0	0	0.278146	0.397814	3.23426	0.103496	0.973511	3.71293	0.30402	0	0	0	1.60743	0	0.284615	0	0.0291083	0.0743879	0.815033	0	2.53242	0	0.756816	0.439859	0.598338	1.77561
FMT-SE118-P5-T3	0.186987	0.373974	0.17431	0	12.0432	3.13124	0.488068	0.0982474	0.320096	0	2.54809	0.266219	0	0	1.66387	0.630685	8.02776	0.99832	0	1.59097	0.659208	0	0	0	0	0	0	8.21475	0.586315	2.0727	6.74421	0.0602161	0	0	0	1.19482	0	0.177479	0	0.0728932	0	0	0	0	0	0	0.0919089	0.155294	0
FMT-SE119-P5-T4	0	0	0	0	7.6991	1.38448	1.31639	0	0.771675	0	2.34529	0.189136	0	0	5.75982	0.922984	4.34761	0.408534	0	1.13229	0.148787	0	0	0	0.527059	0	0	6.08766	0.26479	2.36294	8.17572	0	0	0.0706108	0	0	0	0	0.638019	0.0529581	0	0	0	0.62541	0	0	0.244616	0	0
FMT-SE120-P5-T5	0.311986	0.615586	0.0536751	0.204636	16.2484	2.4875	0.823577	0.0620618	0.407595	0	3.46036	0.16438	0	0.280117	2.55963	0.679325	5.0421	3.77067	0.40424	1.32846	0.0335469	0.129156	0.0771579	0	0	0.375725	0.110705	5.82374	0.400886	0.727968	5.20313	0	0	0.00670938	0	0.577007	0	0.254957	0.135865	0.0788353	0.0301922	0	0	0.457915	0.197927	0	0.613909	0.152638	0
SE116-P5-C1	0.0472268	0	0.166238	0.936981	8.88431	2.03264	3.56279	0.579946	3.83671	0	2.06476	0.239912	0	0.153015	0.134124	0.213465	2.17055	0.491159	0	1.0541	0.443932	0.477936	0	0.077452	0.120901	0.18324	0	3.2511	0.878419	1.80407	9.10156	0.0415596	0	0.10201	1.3658	0.268248	0.260692	0.434487	0.404262	0.757519	0.0188907	0	4.2523	0	0.464712	0	0.139791	0.260692	0
SE117-P5-C2	0	0	0.281096	0.532461	7.70312	1.84875	2.82718	0.289205	3.54073	0	4.00562	0.79734	0	0	2.63798	0.31353	3.78399	4.35429	0	0.283799	0.545975	0.405427	0	0.205417	0.737878	0.218931	0.218931	2.92989	1.10276	1.44062	9.75188	0	0	0	0	0.659495	1.83253	0.089194	0	0.775718	0.0243256	0	0	0.459484	0	0	0.224336	0.254068	0
SE118-P5-C3	0.914027	2.44741	0.204633	0.141879	9.75962	3.14589	0.21009	0.141879	1.12957	0.0791247	1.64798	0.905842	0.128237	0.240103	0.411994	0.240103	4.66017	0.900385	0.709394	0.491119	2.26733	0	0	0	0	0.335598	0	3.15135	0.311042	1.05863	3.99443	0	0	0	0.231917	1.15686	1.13776	0.223732	0.884014	0.0327413	0	0	0.605713	0.952225	0	3.09678	0	0.395624	3.04221
SE119-P5-C4	0.10146	1.01046	0.0869655	0.372709	10.411	2.7684	1.57159	0.254685	1.31691	0	0.956621	0.349933	0	0	0.619112	0.490734	5.93229	1.7331	0	2.60275	0.401698	0	0	0.0993892	0	0.308521	0.147013	4.84729	0.467957	2.17828	7.74821	0	1.12434	0.267108	0	0.701936	0	0	0.244332	0.244332	0.0289885	0.44311	0	0.165649	0.269179	0	0.385133	0.188425	0
SE129-P5-C5	0.665872	0	0.110979	0.197295	12.4152	1.95857	0.429529	0.0883719	1.96268	0	2.69843	0.182909	0	0.443915	0.25073	0.0534342	1.28653	0.316495	0	0.750134	1.16733	0.230178	0	0.0246619	0	0.324715	0.154137	4.62206	0.889884	1.97706	10.3745	0.224012	0	0	0.129475	2.24629	0.869333	0	0	0.6371	0	1.36668	0	0.606272	0	0	0.197295	0.550783	0
[truncated: 26 more columns]
